# Supplementary material
Source: Springer Nature journal article supplement (https://www.springermedizin.de/resource/supplementary/12985_2006_224_MOESM7_ESM.pdf/9607522)

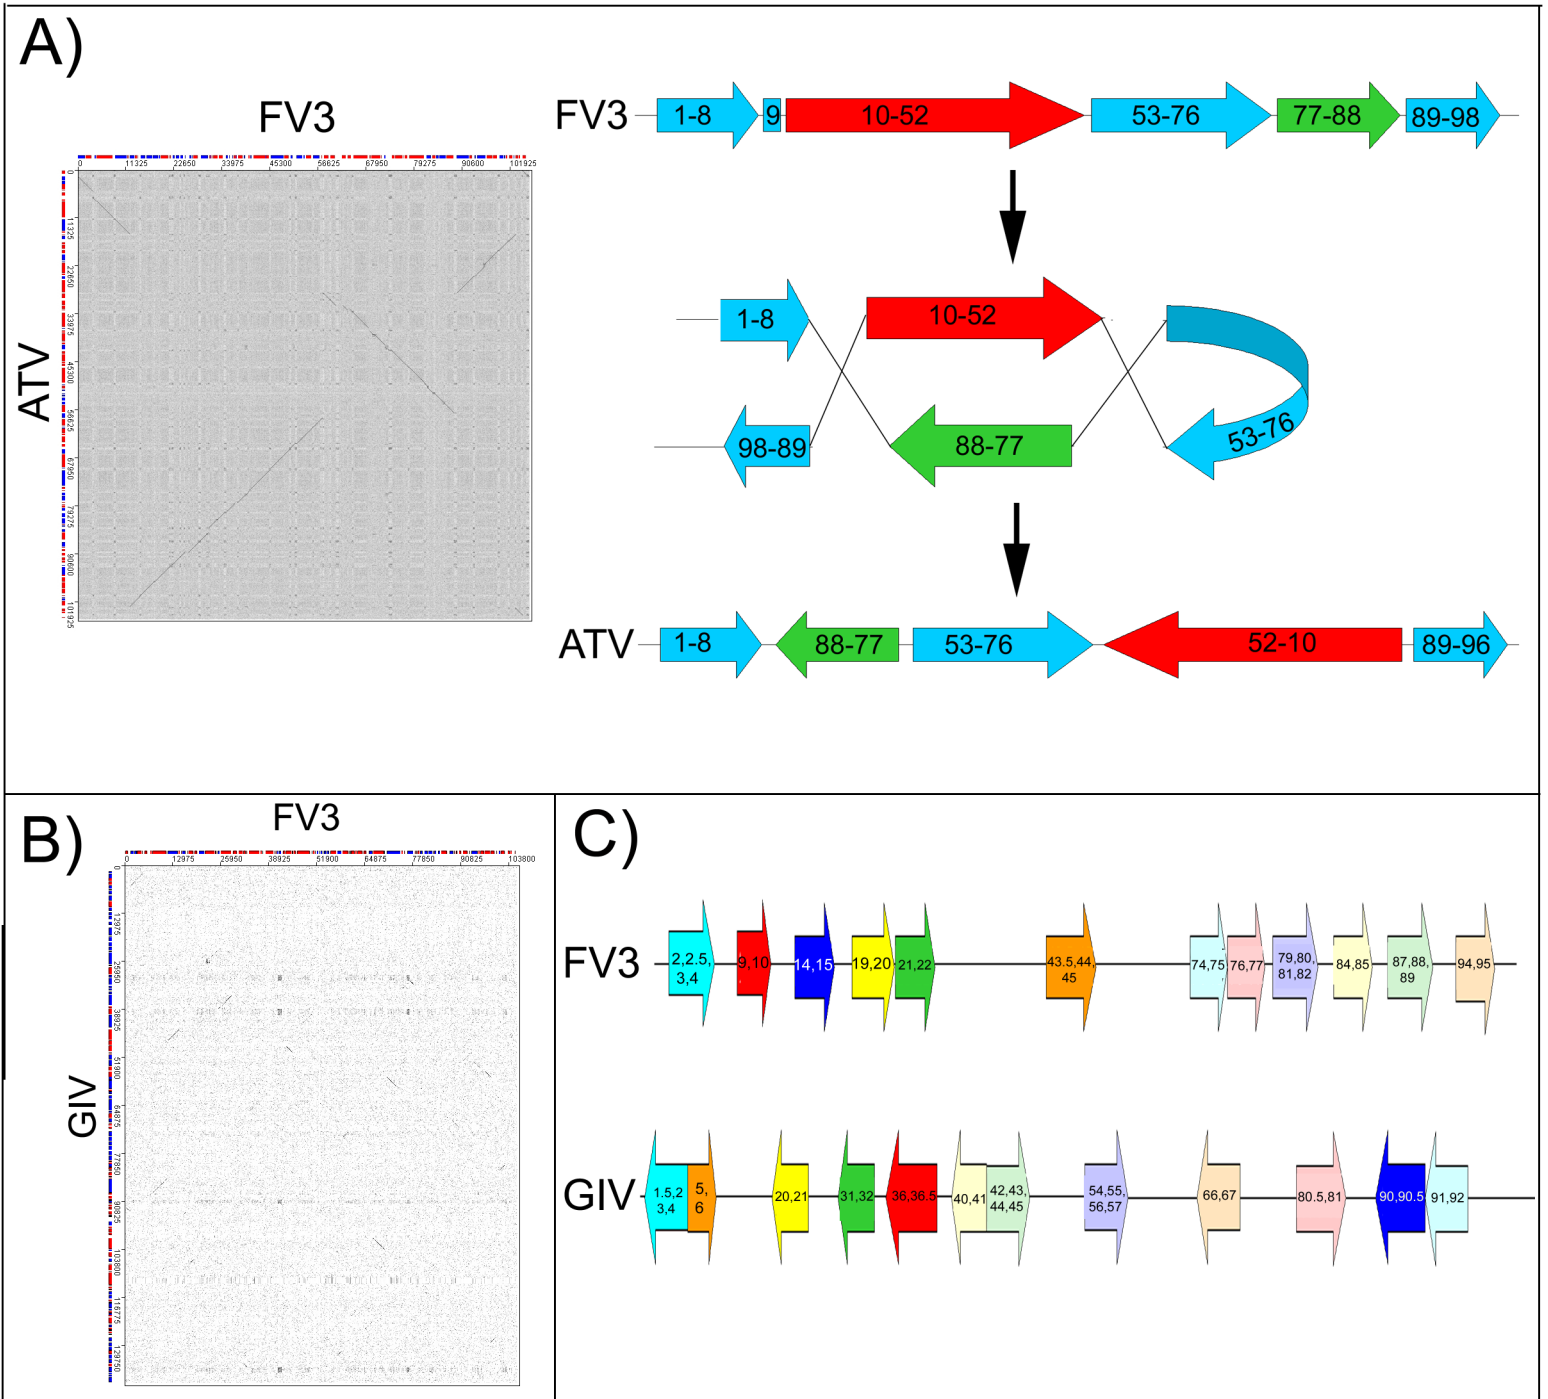

Figure 2. Eaton et al.

Supplement: MOESM7 [file 9607522]
